# Supplementary material for: Gas-phase synthesis and reactivity of binuclear gold hydride cations, (R3PAu)2H+ (R = Me and Ph)
Source: Royal Society of Chemistry journal article supplement (doi:10.1039/b604404b), 2006-01-01
Supplement: b604404b.pdf [file b604404b.pdf]

**Supplementary material for Dalton Transactions manuscript:  
Gas Phase Synthesis and Reactivity of Binuclear Gold Hydride Cations,  
(R<sub>3</sub>PAu)<sub>2</sub>H<sup>+</sup> (R=Me and Ph).**

*George N. Khairallah, Richard A. J. O'Hair\* and Michael I. Bruce*

**List of material:**

**A- Figure S1: Structures with key bond lengths for gold species I – O.**

**B- List of the Cartesian coordinates of the structures presented in figures 3, 6 and S1 and discussed throughout the text:**

**Structure C: Au<sub>2</sub>H(PH<sub>3</sub>)<sub>2</sub><sup>+</sup> (Figure 3a)**

**Structure F: Au(PH<sub>3</sub>)<sub>2</sub><sup>+</sup>HAu (Figure 3b)**

**Structure G: Au(PH<sub>3</sub>)<sub>2</sub><sup>+</sup>AuH (Figure 3c)**

**Structure H: Au(PH<sub>3</sub>)<sub>2</sub><sup>+</sup>HAu (Figure 3a)**

**Transition state for isomerization of C to X (Figure 6)**

**Structure I: Au<sub>2</sub>H<sup>+</sup> (Figure S1a)**

**Structure J: Au<sub>2</sub>H(PH<sub>3</sub>)<sup>+</sup> (Figure S1b)**

**Structure K: (HAuPH<sub>3</sub>)<sub>2</sub> (Figure S1c)**

**Structure L: HAuPH<sub>3</sub> (Figure S1d)**

**Structure M: AuH (Figure S1e)**

**Structure N: Au(PH<sub>3</sub>)<sub>2</sub><sup>+</sup> (Figure S1g)**

**Structure O: Au(PH<sub>3</sub>)<sup>+</sup> (Figure S1f)**

**C- Supporting Tables:**

**Table S1:** Peak assignments for figs. 3, S1 and S3. Note that the *m/z* shown are for the strongest peak in the cluster if applicable.

**Table S2:** The calculated B3LYP/6-31G(d) energies (in Hartrees) of the various structures used in the thermochemistry calculations in the text. The basis set used for Au is the LanL2DZ.

**Table S3:** Estimated thermochemistry for eqs. 11-13 using the DFT calculated energies from Table S2.

Figure S1: Structures with key bond lengths for gold species I – O.

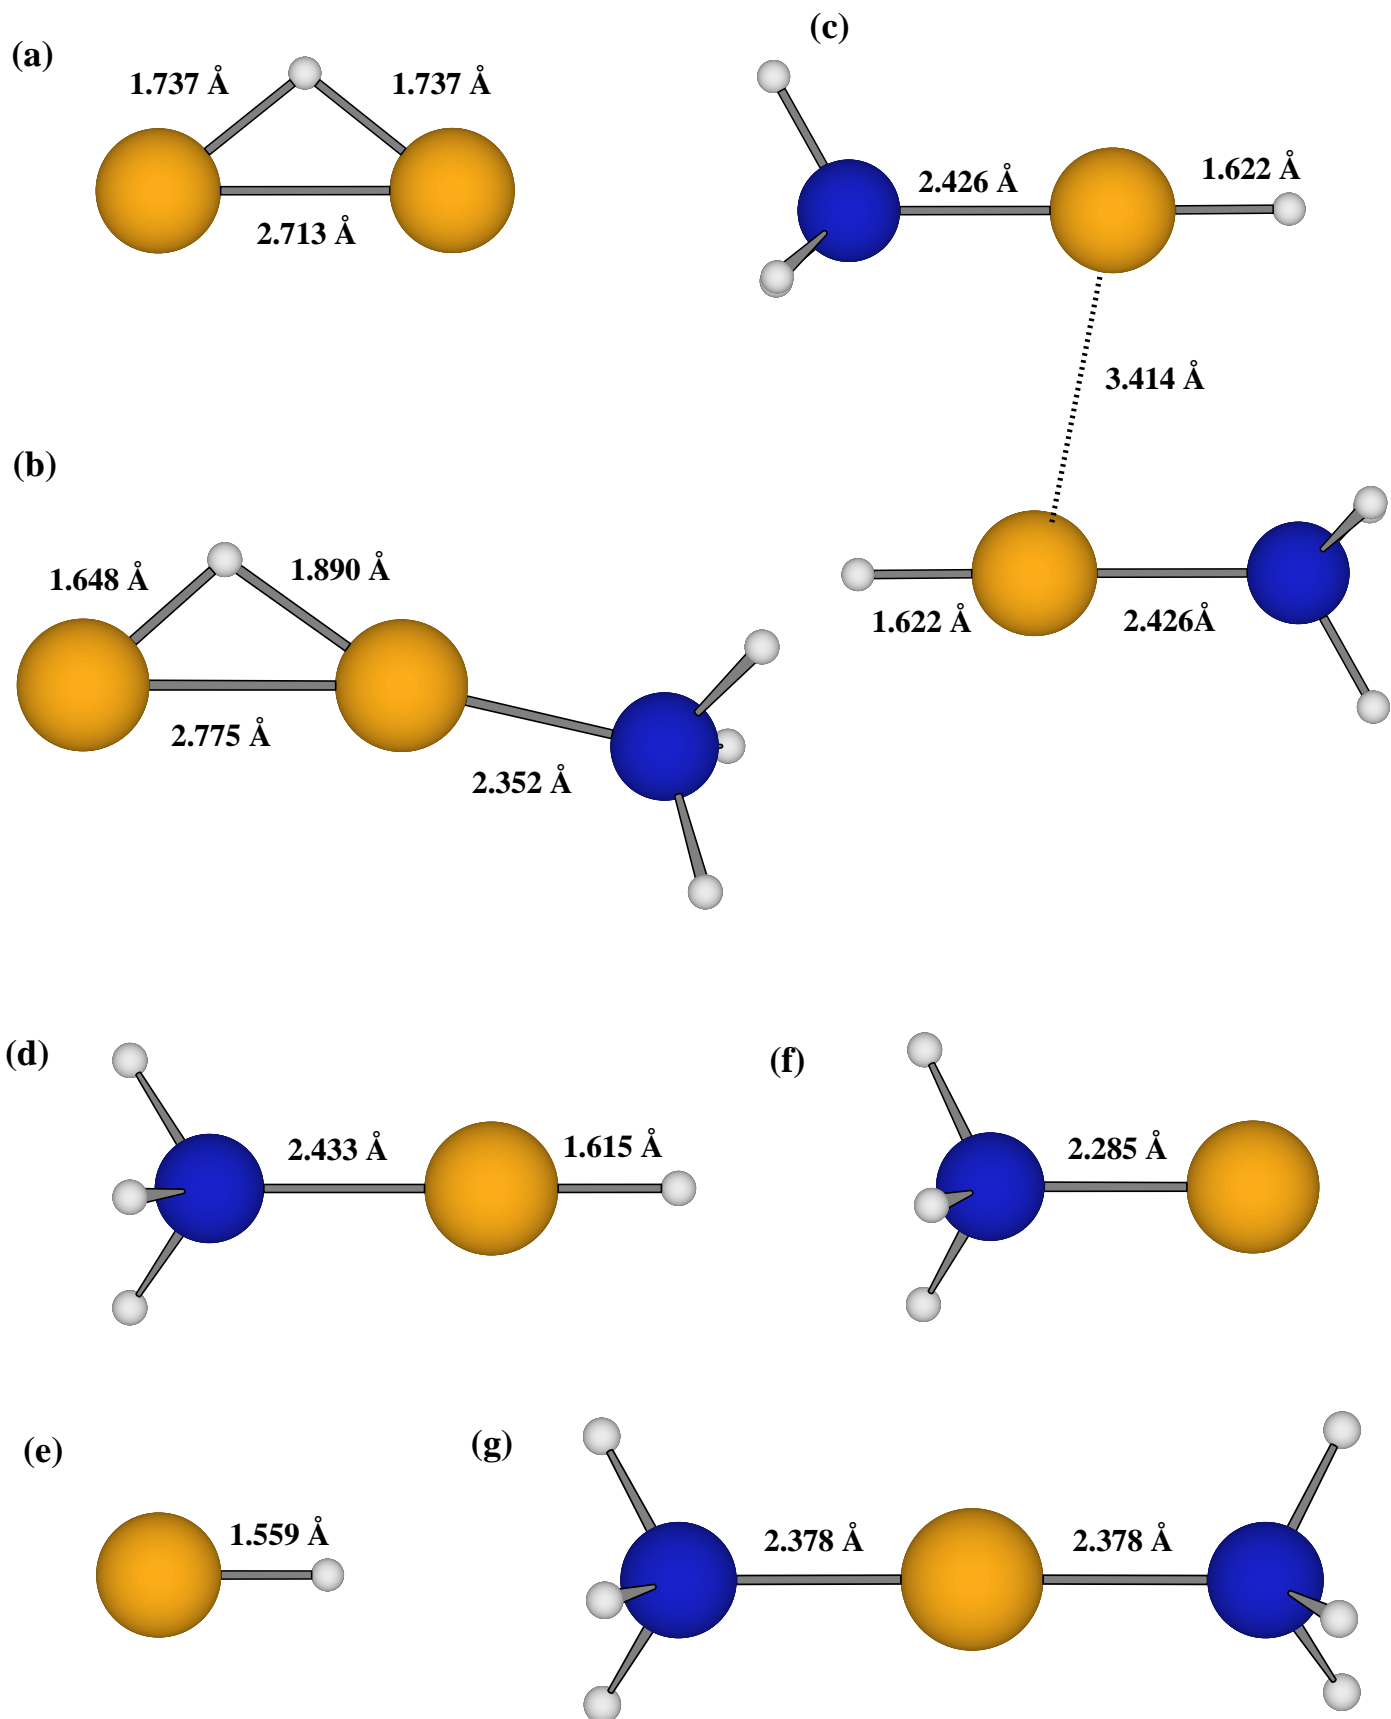

**B- List of the Cartesian coordinates of the structures presented in figures 3, 6 and S1 and discussed throughout the text:****Structure C: Au<sub>2</sub>H(PH<sub>3</sub>)<sub>2</sub><sup>+</sup> (Figure 3a)**

|    |           |           |           |
|----|-----------|-----------|-----------|
| Au | -1.453324 | -0.167521 | 0.000208  |
| H  | -0.000055 | -1.119668 | 0.000024  |
| Au | 1.453368  | -0.167500 | -0.000209 |
| P  | 3.634510  | 0.728008  | 0.000519  |
| P  | -3.634686 | 0.728010  | -0.000518 |
| H  | -4.625191 | -0.085558 | 0.575904  |
| H  | -4.188894 | 1.017130  | -1.259365 |
| H  | -3.818280 | 1.941320  | 0.685136  |
| H  | 3.817798  | 1.941542  | -0.684835 |
| H  | 4.625081  | -0.085259 | -0.576209 |
| H  | 4.188755  | 1.016878  | 1.259405  |

**Structure F: Au(PH<sub>3</sub>)<sub>2</sub><sup>+</sup>HAu (Figure 3b)**

|    |           |           |           |
|----|-----------|-----------|-----------|
| Au | 1.465095  | 0.000205  | -0.000057 |
| P  | 1.646753  | 2.380674  | 0.000102  |
| H  | 2.941916  | 2.927142  | -0.002516 |
| H  | 1.053310  | 3.033154  | 1.094276  |
| H  | 1.048523  | 3.033927  | -1.090996 |
| P  | 1.649321  | -2.379915 | 0.000117  |
| H  | 1.055765  | -3.033538 | -1.093307 |
| H  | 1.052898  | -3.033557 | 1.091966  |
| H  | 2.945172  | -2.924734 | 0.001795  |
| Au | -2.210668 | -0.000429 | 0.000007  |
| H  | -0.638503 | 0.003930  | -0.000528 |

**Structure G: Au(PH<sub>3</sub>)<sub>2</sub><sup>+</sup>AuH (Figure 3c)**

|    |           |           |           |
|----|-----------|-----------|-----------|
| Au | -1.218243 | 0.000603  | -0.000057 |
| P  | -1.144622 | -2.385468 | 0.000142  |
| H  | -2.393695 | -3.031523 | -0.001059 |
| H  | -0.490414 | -2.959712 | 1.101562  |
| H  | -0.487948 | -2.960038 | -1.099637 |
| P  | -1.140490 | 2.386325  | 0.000136  |
| H  | -0.483033 | 2.959943  | -1.099664 |
| H  | -0.485182 | 2.959280  | 1.101574  |
| H  | -2.388505 | 3.034438  | -0.000855 |
| Au | 1.695921  | -0.000737 | -0.000055 |

H 3.268903 -0.004719 0.002733

**Structure H: Au(PH<sub>3</sub>)<sub>2</sub><sup>+</sup>HAu (Figure 3d)**

Au -1.334318 0.000058 -0.006428  
P -1.466091 -2.374686 0.005991  
H -2.751491 -2.940107 -0.061737  
H -0.926786 -3.005625 1.139944  
H -0.801475 -3.038681 -1.039440  
P -1.465537 2.374839 0.005937  
H -0.791988 3.039204 -1.033516  
H -0.935495 3.004976 1.144700  
H -2.750151 2.940725 -0.072129  
Au 1.986250 -0.000106 -0.015148  
H 1.429215 0.000971 1.447761

**Transition state for isomerization of C to G (Figure 6)**

Au 1.071959 0.137615 -0.000135  
P -0.638880 2.112009 0.000257  
H -0.195519 2.886647 -1.087327  
H -0.224418 2.874921 1.107220  
H -2.018181 2.412458 -0.017506  
P 3.241719 -0.750263 0.000183  
H 3.304162 -2.149488 -0.107767  
H 4.006331 -0.491276 1.149794  
H 4.082413 -0.319161 -1.039457  
Au -1.650044 -0.438420 -0.000061  
H -2.328676 -1.876710 0.003973

**Structure I: Au<sub>2</sub>H<sup>+</sup> (Figure S1a)**

Au 0.006824 1.356490 0.000000  
H -1.078162 -0.001549 0.000000  
Au 0.006824 -1.356470 0.000000

**Structure J: Au<sub>2</sub>H(PH<sub>3</sub>)<sup>+</sup> (Figure S1b)**

Au 0.999152 -0.112951 -0.000597  
P 3.320537 0.265150 0.001393  
H 3.935478 0.225917 1.263348  
H 3.732182 1.505615 -0.513778  
H 4.072521 -0.654330 -0.748072

|    |           |           |          |
|----|-----------|-----------|----------|
| Au | -1.770533 | 0.062976  | 0.000164 |
| H  | -0.609141 | -1.106463 | 0.011771 |

**Structure K: (HAuPH<sub>3</sub>)<sub>2</sub> (Figure S1c)**

|    |           |           |           |
|----|-----------|-----------|-----------|
| Au | -1.633222 | -0.496099 | -0.000060 |
| H  | -1.511996 | -2.113976 | 0.000716  |
| P  | -1.829922 | 1.922087  | 0.000155  |
| H  | -3.116674 | 2.508813  | 0.000090  |
| H  | -1.258880 | 2.634318  | -1.071975 |
| H  | -1.259704 | 2.633021  | 1.073570  |
| Au | 1.633278  | 0.496095  | -0.000022 |
| H  | 1.512147  | 2.113888  | -0.000728 |
| P  | 1.829651  | -1.922081 | 0.000223  |
| H  | 1.259415  | -2.632810 | -1.073269 |
| H  | 1.258834  | -2.634493 | 1.072271  |
| H  | 3.116516  | -2.508513 | 0.000141  |

**Structure L: HAuPH<sub>3</sub> (Figure S1d)**

|    |           |           |           |
|----|-----------|-----------|-----------|
| Au | 0.451369  | -0.000021 | -0.000014 |
| H  | 2.066457  | 0.000858  | 0.000565  |
| P  | -1.981558 | 0.000024  | 0.000030  |
| H  | -2.666809 | -0.075487 | 1.231744  |
| H  | -2.667561 | -1.029088 | -0.681288 |
| H  | -2.666833 | 1.104981  | -0.550350 |

**Structure M: AuH (Figure S1e)**

|    |          |          |           |
|----|----------|----------|-----------|
| Au | 0.000000 | 0.000000 | 0.019492  |
| H  | 0.000000 | 0.000000 | -1.539876 |

**Structure N: Au(PH<sub>3</sub>)<sub>2</sub><sup>+</sup> (Figure S1g)**

|    |           |           |           |
|----|-----------|-----------|-----------|
| Au | 0.000024  | 0.001906  | -0.004886 |
| P  | 2.378450  | -0.003781 | 0.009485  |
| H  | 2.996868  | -0.912622 | -0.866205 |
| H  | 2.975426  | -0.317951 | 1.241981  |
| H  | 2.998863  | 1.211998  | -0.324781 |
| P  | -2.378445 | -0.003749 | 0.009358  |
| H  | -3.001016 | 1.161379  | -0.469809 |
| H  | -2.976564 | -0.167405 | 1.270520  |
| H  | -2.995566 | -1.013028 | -0.748374 |

**Structure O: Au(PH<sub>3</sub>)<sup>+</sup> (Figure S1f)**

|    |           |           |           |
|----|-----------|-----------|-----------|
| Au | 0.441238  | 0.000008  | 0.000000  |
| P  | -1.844141 | -0.000002 | 0.000000  |
| H  | -2.398084 | -0.663419 | -1.104744 |
| H  | -2.399484 | 1.288526  | -0.021758 |
| H  | -2.398098 | -0.625713 | 1.126511  |

**C- Supporting Tables:**

**Table S1:** The peak assignments in Figures 1, 2, 4 and 5. Note that the *m/z* shown are for the strongest peak in the cluster if applicable.

| <i>m/z</i> | Assignment                                                              | Comments                                                                                                                             |
|------------|-------------------------------------------------------------------------|--------------------------------------------------------------------------------------------------------------------------------------|
| 152        | [Ph <sub>2</sub> -2H] <sup>+</sup>                                      | Product of EED                                                                                                                       |
| 183        | [PPh <sub>2</sub> -2H] <sup>+</sup>                                     | Product of EED of [(Ph <sub>3</sub> PAu)(PMe <sub>3</sub> Au)H] <sup>+</sup> and [(Ph <sub>2</sub> PAu) <sub>2</sub> H] <sup>+</sup> |
| 263        | [HPPPh <sub>3</sub> ] <sup>+</sup>                                      | Product of EED                                                                                                                       |
| 459        | AuPPh <sub>3</sub> <sup>+</sup>                                         |                                                                                                                                      |
| 477        | AuPPh <sub>3</sub> <sup>+</sup> .H <sub>2</sub> O                       | Reaction with background                                                                                                             |
| 491        | AuPPh <sub>3</sub> <sup>+</sup> .MeOH                                   | Reaction with background                                                                                                             |
| 500        | AuPPh <sub>3</sub> <sup>+</sup> .CH <sub>3</sub> CN                     | Reaction with background                                                                                                             |
| 516        | (AuPPh <sub>3</sub> )(Me <sub>2</sub> NCH <sub>2</sub> -H) <sup>+</sup> |                                                                                                                                      |
| 560        | (AuPPh <sub>3</sub> )(DMG-2H) <sup>+</sup>                              |                                                                                                                                      |
| 644        | AuPPh <sub>2</sub> <sup>+</sup>                                         | Loss of Ph                                                                                                                           |
| 721        | Au(PPh <sub>3</sub> ) <sub>2</sub> <sup>+</sup>                         | Most intense peak in MS of Ph <sub>3</sub> PAuCl                                                                                     |
| 919        | (AuPPh <sub>3</sub> ) <sub>2</sub> H <sup>+</sup>                       |                                                                                                                                      |
| 953        | (AuPPh <sub>3</sub> ) <sub>2</sub> Cl <sup>+</sup>                      |                                                                                                                                      |

|      |                                                                             |                                               |
|------|-----------------------------------------------------------------------------|-----------------------------------------------|
| 977  | $(\text{AuPPh}_3)_2\text{CH}_3\text{COO}^+$                                 |                                               |
| 1011 | $\text{Na}(\text{AuPPh}_3\text{Cl})_2^+$                                    |                                               |
| 1119 | $(\text{AuPPh}_3\text{Cl})(\text{AuPPh}_3\text{CH}_3\text{COO})\text{Ag}^+$ |                                               |
| 1020 | $(\text{AuPPh}_3)_2[\text{DMG-H}]^+$                                        |                                               |
| 1095 | $\text{Ag}(\text{AuPPh}_3\text{Cl})_2^+$                                    |                                               |
| 1377 | $(\text{AuPPh}_3)_3^+$                                                      |                                               |
|      |                                                                             |                                               |
| 197  | $\text{Au}^+$                                                               | Seen in the $\text{P}(\text{Me})_3$ case only |
| 243  | $\text{AuPCH}_3^+$                                                          | Product of EED                                |
| 273  | $\text{AuPMe}_3^+$                                                          |                                               |
| 330  | $(\text{AuPMe}_3)(\text{Me}_2\text{NCH}_2\text{-H})^+$                      |                                               |
| 333  | $[\text{Au}(\text{PMe}_3)_2\text{-CH}_4]^+$                                 | Loss of $\text{CH}_4$                         |
| 349  | $\text{Au}(\text{PMe}_3)_2^+$                                               |                                               |
| 374  | $(\text{AuPMe}_3)(\text{DMG-2H})^+$                                         |                                               |
| 723  | $(\text{AuPMe}_3\text{Cl})_2\text{Ag}^+$                                    |                                               |
| 547  | $(\text{AuPMe}_3)_2\text{H}^+$                                              |                                               |
| 581  | $(\text{AuPMe}_3)_2\text{Cl}^+$                                             |                                               |
| 605  | $(\text{AuPMe}_3)_2(\text{CH}_3\text{COO})^+$                               |                                               |
| 648  | $(\text{AuPMe}_3)_2(\text{DMG-H})^+$                                        |                                               |
|      |                                                                             |                                               |
| 471  | $\text{AuHAuPMe}_3^+$                                                       |                                               |
| 535  | $\text{AuPPh}_3\text{PMe}_3^+$                                              |                                               |

|     |                                                               |  |
|-----|---------------------------------------------------------------|--|
| 731 | $(\text{AuPPh}_3)(\text{AuPMe}_3)(-\text{H})^+$               |  |
| 733 | $(\text{AuPPh}_3)(\text{AuPMe}_3)\text{H}^+$                  |  |
| 767 | $(\text{AuPPh}_3)(\text{AuPMe}_3)\text{Cl}^+$                 |  |
| 791 | $(\text{AuPPh}_3)(\text{AuPMe}_3)(\text{CH}_3\text{COO})^+$   |  |
| 834 | $(\text{AuPPh}_3)(\text{AuPMe}_3)(\text{DMG-H})^+$            |  |
| 911 | $(\text{AuPPh}_3)(\text{AuPMe}_3)\text{Cl}\cdot\text{AgCl}^+$ |  |

DMG = N,N-Dimethyl glycine; PMe<sub>3</sub>= trimethyl phosphine; PPh<sub>3</sub>= triphenyl phosphine



**Table S2:** The calculated B3LYP/6-31G(d) energies (in Hartrees) of the various structures used in the thermochemistry calculations in the text. The basis set used for Au is the LanL2DZ.

| species                                                           | E(B3LYP)   | ZPE <sup>-</sup> | ZPE(Scaled) | E(B3LYP Scaled) | Relative isomer stability (kJ/mol) |
|-------------------------------------------------------------------|------------|------------------|-------------|-----------------|------------------------------------|
| Au <sub>2</sub> H(PH <sub>3</sub> ) <sub>2</sub> <sup>+</sup> (C) | -957.66847 | 0.062880         | 0.061660    | -957.60681      | 0                                  |
| isomer F                                                          | -957.62871 | 0.062160         | 0.060954    | -957.56775      | 102.5                              |
| isomer G*                                                         | -957.62330 | 0.062000         | 0.060800    | -957.56251      | 116.3                              |
| Isomer H                                                          | -957.62699 | 0.061567         | 0.060373    | -957.56661      | 105.5                              |
| TS (C → G)                                                        | -957.61368 | 0.061679         | 0.060482    | -957.55320      | 140.8                              |
| Au <sub>2</sub> H <sup>+</sup> (I)                                | -271.22467 | 0.005411         | 0.005306    | -271.21936      |                                    |
| Au <sub>2</sub> H(PH <sub>3</sub> ) <sup>+</sup> (J)              | -614.45202 | 0.034144         | 0.033482    | -614.41854      |                                    |
| (H <sub>3</sub> PAuH) <sub>2</sub> (K)                            | -958.45986 | 0.069101         | 0.067760    | -958.39210      |                                    |
| H <sub>3</sub> PAuH (L)                                           | -479.22393 | 0.033706         | 0.033052    | -479.19088      |                                    |
| AuH (M)                                                           | -136.04665 | 0.004785         | 0.0046922   | -136.041958     |                                    |
| Au(PH <sub>3</sub> ) <sub>2</sub> <sup>+</sup> (N)                | -821.57147 | 0.055732         | 0.054651    | -821.51682      |                                    |
| Au(PH <sub>3</sub> ) <sup>+</sup> (O)                             | -478.35010 | 0.027950         | 0.027408    | -478.32270      |                                    |
| PH <sub>3</sub>                                                   | -343.13781 | 0.024242         | 0.023772    | -343.11404      |                                    |

\* This structure is the minimum energy structure from the output of the IRC calculation in the forward direction.

<sup>-</sup>Zero point energy from the frequency calculation.

**Table S3:** Estimated thermochemistry for eqs. 11-13 using the DFT calculated energies from Table S2.

| Eq.# | Reactions in text                                                                                                                  | ΔH (kJ mol <sup>-1</sup> ) |
|------|------------------------------------------------------------------------------------------------------------------------------------|----------------------------|
| 11   | Au <sub>2</sub> H(PH <sub>3</sub> ) <sub>2</sub> <sup>+</sup> → PH <sub>3</sub> + Au <sub>2</sub> H(PH <sub>3</sub> ) <sup>+</sup> | 194.9                      |
| 12   | Au <sub>2</sub> H(PH <sub>3</sub> ) <sub>2</sub> <sup>+</sup> → Au(PH <sub>3</sub> ) <sup>+</sup> + AuH(PH <sub>3</sub> )          | 244.8                      |
| 13   | Au <sub>2</sub> H(PH <sub>3</sub> ) <sub>2</sub> <sup>+</sup> → AuH + Au(PH <sub>3</sub> ) <sub>2</sub> <sup>+</sup>               | 126.1                      |
